# Supplementary material for: Encapsulation of Cu nanoparticles in nanovoids of plate-like silica sodalite through interlayer condensation of Cu2+ ion-exchanged layered silicate RUB-15
Source: Royal Society of Chemistry journal article supplement (doi:10.1039/d0dt01083a), 2020-01-01
Supplement: d0dt01083a1.pdf [file d0dt01083a1.pdf]

Electronic Supplementary Information

**Encapsulation of Cu nanoparticles in nanovoids of plate-like  
silica sodalite through interlayer condensation of Cu<sup>2+</sup>  
ion-exchanged layered silicate RUB-15**

Masakazu Koike,<sup>§a</sup> Rika Sakai,<sup>§a</sup> Shimpei Enomoto,<sup>b</sup> Takeshi Mino,<sup>b</sup> Natsuhiko Sugimura,<sup>c</sup>  
Takahiro Goto,<sup>c</sup> Hiroaki Wada,<sup>a</sup> Atsushi Shimojima,<sup>a</sup> Kazuyuki Kuroda<sup>\*a,b</sup>

<sup>§</sup> These authors equally contributed to this work.

<sup>a</sup> Department of Applied Chemistry, Faculty of Science and Engineering, Waseda University, 3-4-1 Ohkubo, Shinjuku-ku, Tokyo 169-8555, Japan.

<sup>b</sup> Kagami Memorial Research Institute for Materials Science and Technology, Waseda University, Nishiwaseda-2, Shinjuku-ku, Tokyo 169-0051, Japan.

<sup>c</sup> Materials Characterization Central Laboratory, Waseda University, 3-4-1 Ohkubo, Shinjuku-ku, Tokyo 169-8555, Japan.

**Contents**

|                                                                                                                                                                          |   |
|--------------------------------------------------------------------------------------------------------------------------------------------------------------------------|---|
| Figure S1. SEM image of CuRUB. ....                                                                                                                                      | 2 |
| Figure S2. <sup>29</sup> Si MAS NMR spectra of (a) CuRUB and (b) the sample after HCl treatment of CuRUB. ...                                                            | 2 |
| Figure S3. XRD patterns of (a) CuRUB, (b) the sample fully exchanged with Cu ions, and (c) the sample after calcination of sample (b). ....                              | 3 |
| Figure S4. STEM-EDS point analysis images and spectra of CuRUB-heat-acid. (a) and (b): STEM images. (c) EDS Spectrum 1, (d) EDS Spectrum 2, and (e) EDS Spectrum 3. .... | 4 |
| Table S1. STEM-EDS point analysis of CuRUB-heat-acid. ....                                                                                                               | 5 |
| Figure S5. TG-MS data of (a) CuRUB and (b) a mixture of TMAcI and CuCl <sub>2</sub> . ....                                                                               | 5 |
| Figure S6. <i>In-situ</i> XRD patterns of CuRUB heated in air. ....                                                                                                      | 6 |

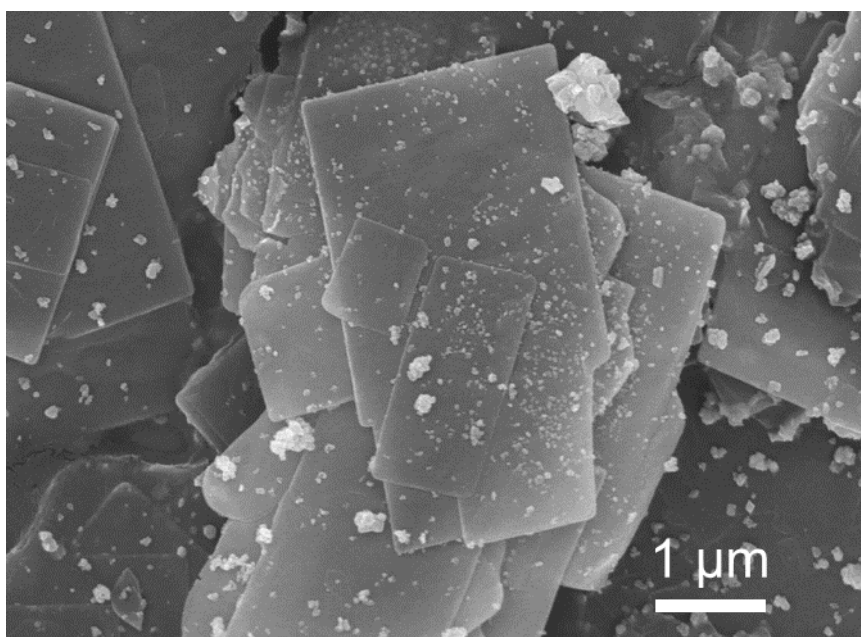

Figure S1. SEM image of CuRUB.

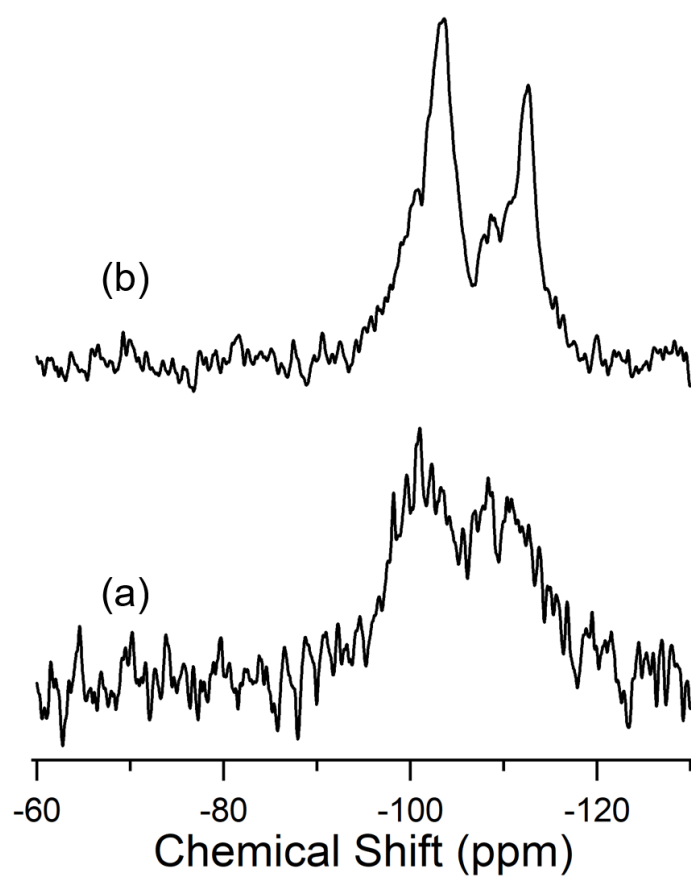

Figure S2. <sup>29</sup>Si MAS NMR spectra of (a) CuRUB and (b) the sample after HCl treatment of CuRUB.

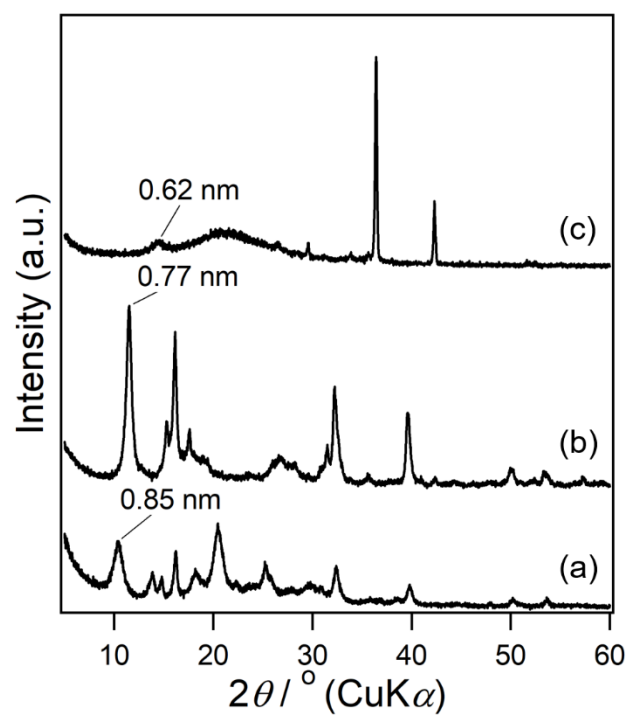

Figure S3. XRD patterns of (a) CuRUB, (b) the sample fully exchanged with Cu ions, and (c) the sample after calcination of sample (b).

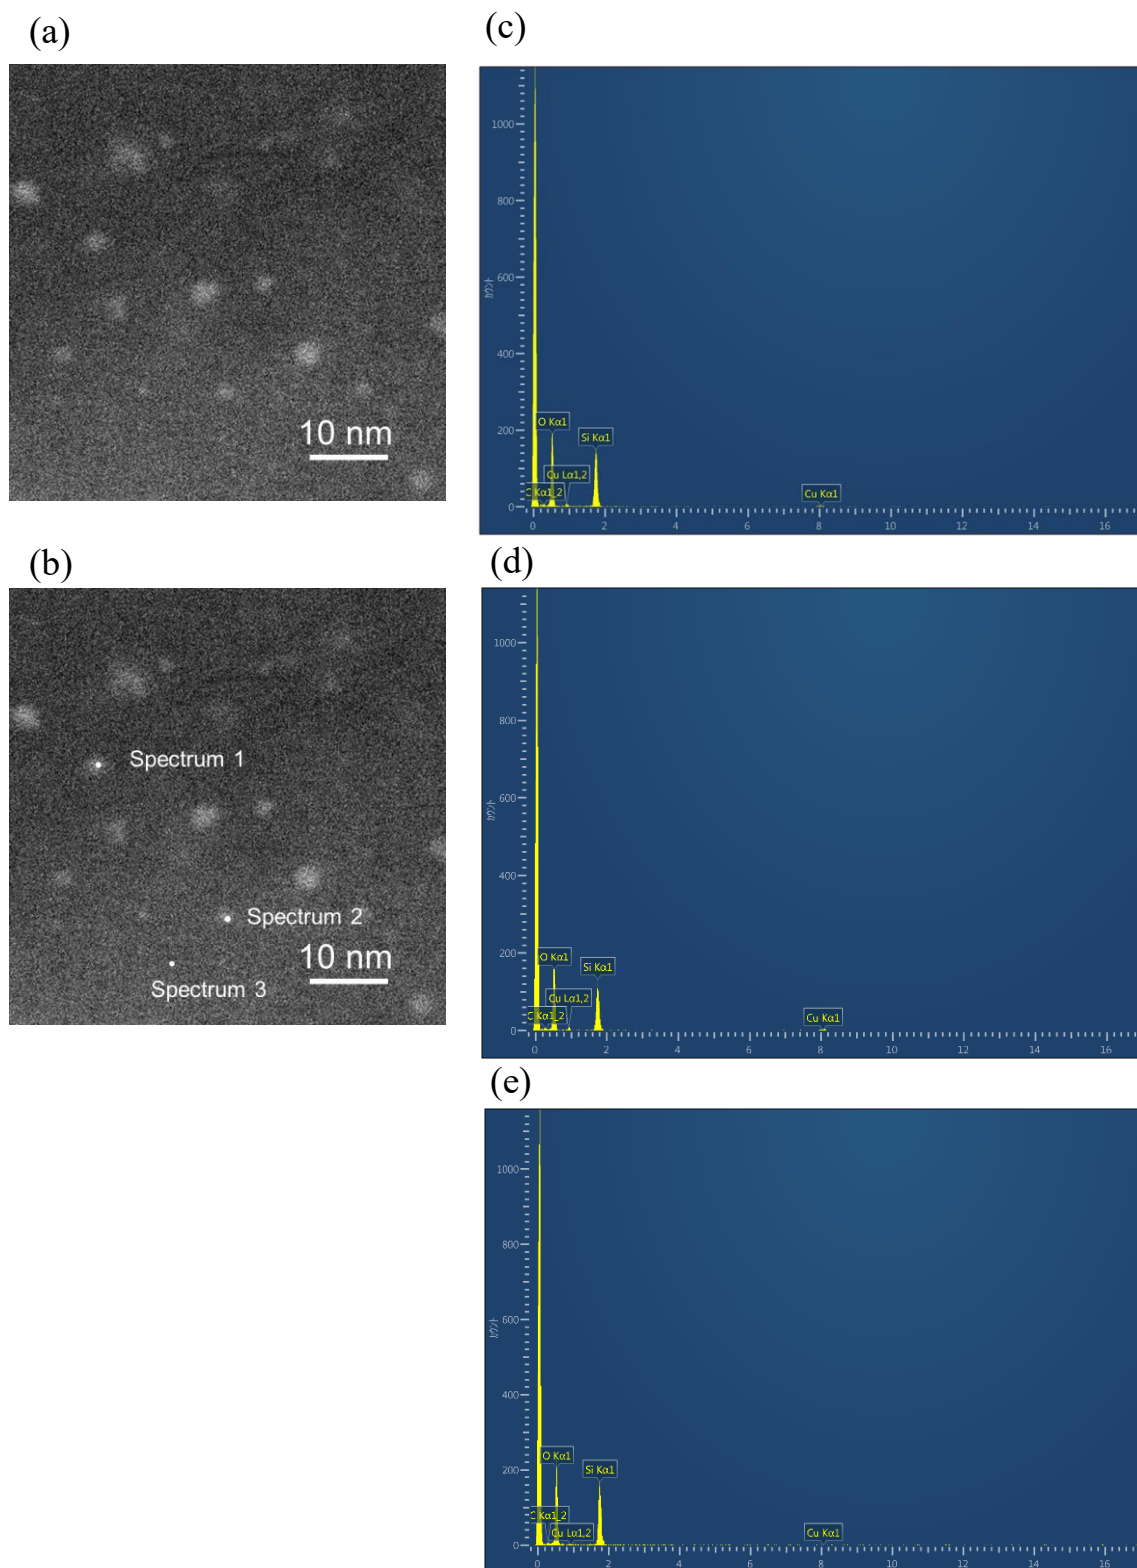

Figure S4. STEM-EDS point analysis images and spectra of CuRUB-heat-acid. (a) and (b): STEM images. (c) EDS Spectrum 1, (d) EDS Spectrum 2, and (e) EDS Spectrum 3.

Table S1. STEM-EDS point analysis of CuRUB-heat-acid.

|       | Atomic concentration / counts |            |            |
|-------|-------------------------------|------------|------------|
|       | Spectrum 1                    | Spectrum 2 | Spectrum 3 |
| C     | 2.07                          | 3.62       | 1.91       |
| O     | 56.66                         | 57.75      | 58.71      |
| Si    | 39.83                         | 36.15      | 39.38      |
| Cu    | 1.44                          | 2.48       | 0.00       |
| Total | 100.00                        | 100.00     | 100.00     |

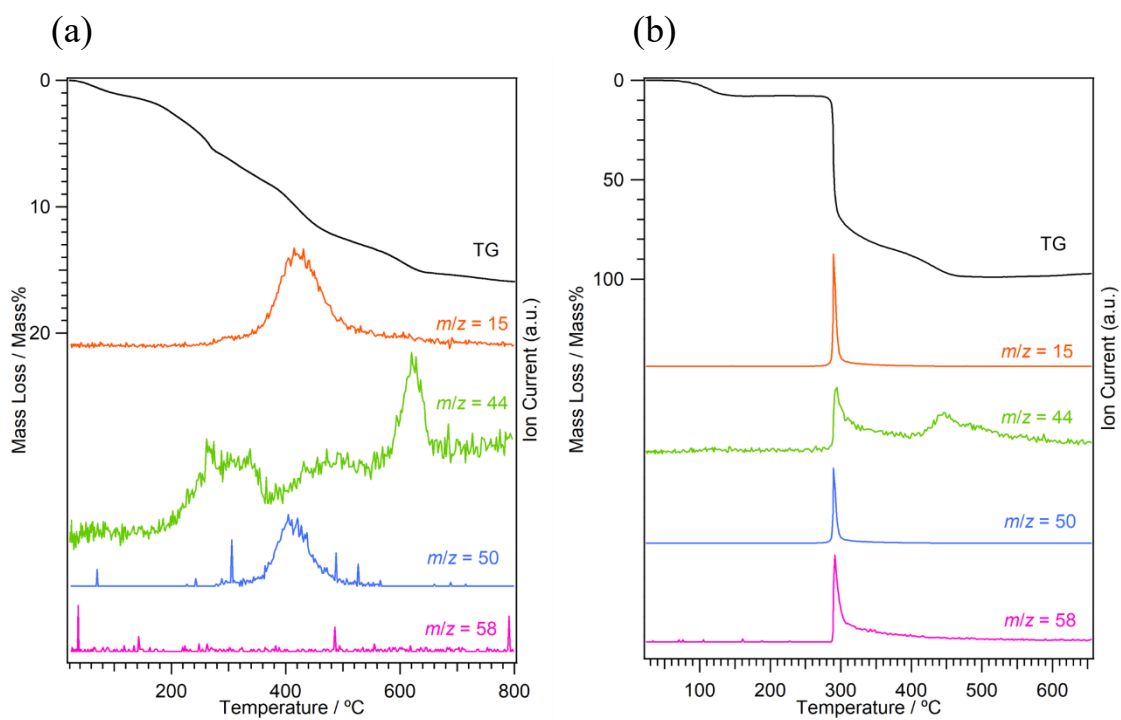

Figure S5. TG-MS data of (a) CuRUB and (b) a mixture of TMACl and  $\text{CuCl}_2$ .

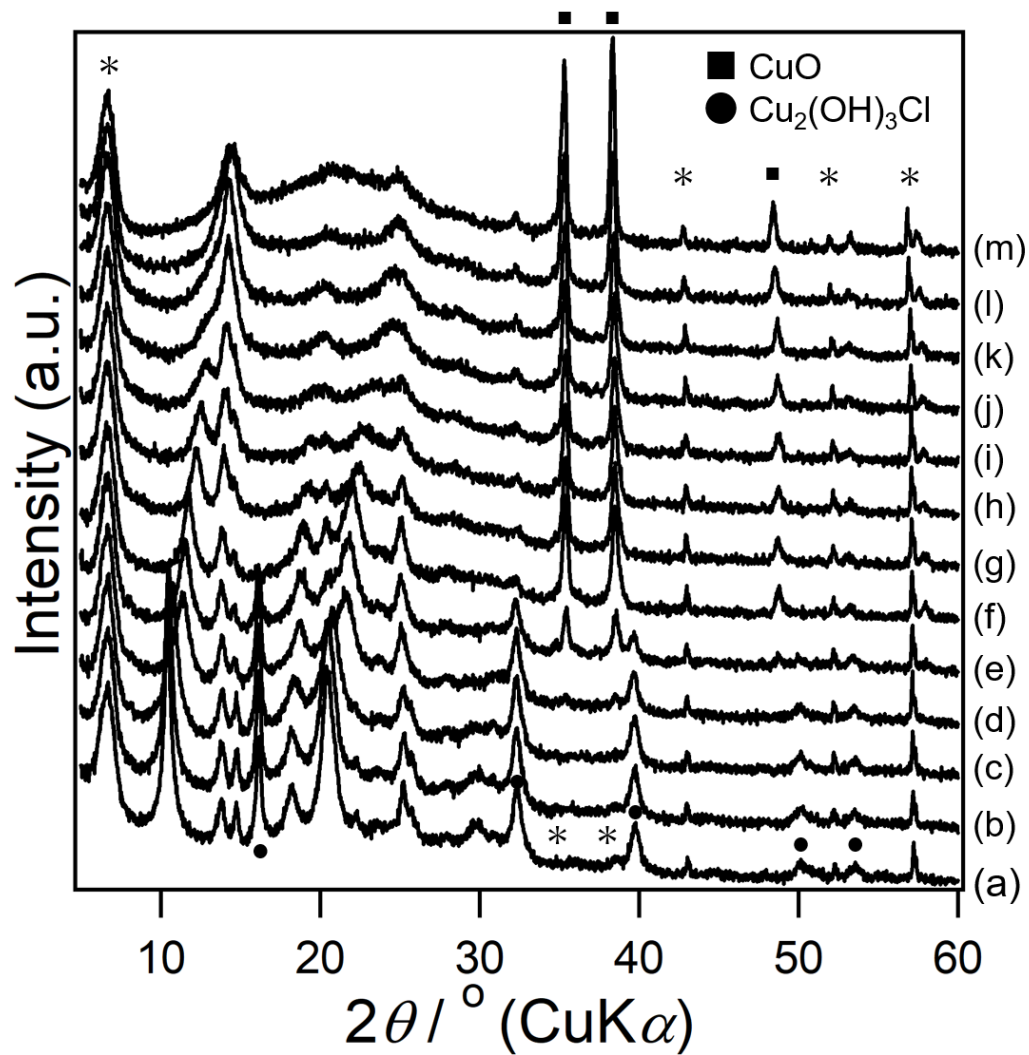

Figure S6. *In-situ* XRD patterns of CuRUB heated in air ((a) 25 °C, (b) 100 °C, (c) 150 °C, (d) 190 °C, (e) 205 °C, (f) 235 °C, (g) 280 °C, (h) 295 °C, (i) 310 °C, (j) 385 °C, (k) 450 °C, (l) 650 °C, (m) 800 °C) by Bragg-Brentano geometry. (\*: artificial peak and sample holder ( $\text{Al}_2\text{O}_3$ )).
